# Supplementary material
Source: publisher figshare collection journal article supplement (https://acs.figshare.com/ndownloader/files/5115433)
Supplement: Supplementary file 1 [file 5115433]

## **A Heteronuclear Bidentate Lewis Acid as a Phosphorescent Fluoride Sensor.**

Mohand Melaimi and François P. Gabbaï\*

Chemistry Department

Texas A&M University 3255 TAMU

College Station, Texas 77843-3255

Fax: (1) 979-845-4719

E-mail: [gabbai@mail.chem.tamu.edu](mailto:gabbai@mail.chem.tamu.edu)

**Supplementary information**

## Experimental part

### General Considerations.

*Due to the toxicity of the mercury compounds discussed in these studies, great caution should be exercised when synthesizing and handling 2 and its anionic derivatives.*

Tetrakis(THF)lithium dimesityl-1,8-naphthalenediylborate (Hoefelmeyer, J. D.; Gabbaï, F. P. *Organometallics* **2002**, *21*, 982) and pentafluorophenylmercury chloride (Tschinkl, M. Schier, A. Riede, J. Gabbaï F. P. *Organometallics* **1999**, *18*, 2040) were synthesized by following published procedures.  $\text{Me}_3\text{SiF}_2\text{S}(\text{NMe}_2)_3$  and trimethylchlorosilane were purchased from Aldrich and used as received. Solvents were dried by reflux under  $\text{N}_2$  over the appropriate drying agents, and freshly distilled prior to use. Dichloromethane was dried over  $\text{CaH}_2$ . Diethylether and THF were dried over Na/K. Air-sensitive compounds were handled under  $\text{N}_2$  atmosphere using standard Schlenk and glovebox techniques. UV-vis spectra were recorded on a JASCO V-530 spectrophotometer. Elemental analyses were performed at Atlantic Microlab (Norcross, GA). The luminescence spectra were recorded with a SLM/AMINCO, Model 8100 spectrofluorometer equipped with a xenon lamp. All melting points were measured on samples in sealed capillaries and are uncorrected.

### NMR spectroscopy

NMR spectra were recorded on a Varian Unity Inova 400 FT NMR spectrometer (399.63 MHz for  $^1\text{H}$ , 376.03 MHz for  $^{19}\text{F}$ , 128.22 MHz for  $^{11}\text{B}$ , 100.50 MHz for  $^{13}\text{C}$ , 75.52 for  $^{199}\text{Hg}$ ) by using internal deuterium lock. Chemical shifts  $\delta$  are given in ppm, and are

referenced against external Me<sub>4</sub>Si (<sup>1</sup>H, <sup>13</sup>C), BF<sub>3</sub>.Et<sub>2</sub>O (<sup>11</sup>B), CFCl<sub>3</sub> (<sup>19</sup>F), and HgMe<sub>2</sub> (<sup>199</sup>Hg).

### Crystallography

The crystallographic measurements were performed using a Siemens SMART-CCD area detector diffractometer, with a graphite-monochromated Mo-K<sub>α</sub> radiation ( $\lambda = 0.71069$  Å). Specimens of suitable size and quality were selected and mounted onto glass fiber with apiezon grease. The structures were solved by direct methods, which successfully located most of the non-hydrogen atoms. Subsequent refinement on  $F^2$  using the SHELXTL/PC package (version 5.1) allowed location of the remaining non-hydrogen atoms. Further crystallographic details can be found in table 1.

### Synthesis and characterization

**1-(dimesitylboron)-8-(pentafluorophenylmercury)naphthalenediyl (2)**. A solution of pentafluoromercury chloride (360 mg, 0.89 mmol) in THF (3 mL) was added to a solution of tetrakis(THF)lithium dimesityl-1,8-naphthalenediylborate (600 mg, 0.89 mmol) in THF (10 mL) at 0°C. The mixture was stirred overnight at room temperature. The solvent were removed under reduced pressure and the product was extracted with hexane (3 x 10 mL). Following filtration and evaporation of the solvent, the yellow solid was washed with acetonitrile (4 x 5 mL) and dried under vacuum to yield a pale yellow powder (480 mg : 72%). mp. 235°C. <sup>1</sup>H NMR (CDCl<sub>3</sub>): 1.44 (br s, 3H, Mes-CH<sub>3</sub>), 1.67 (br s, 3H, Mes-CH<sub>3</sub>), 1.89 (br s, 3H, Mes-CH<sub>3</sub>), 2.14-2.42 (m, 9H, Mes-CH<sub>3</sub>), 6.37 (br s, 1H, Mes-CH), 6.83 (br s, 3H, Mes-CH), 7.37-7.44 (m, 2H, CH), 7.48-7.60 (m, 2H, CH), 7.86 (dd, 1H,

$^3J_{\text{H-H}} = 8.0$  Hz,  $^4J_{\text{H-H}} = 1.1$  Hz, *CH*), 7.98 (dd, 1H,  $^3J_{\text{H-H}} = 8.0$  Hz,  $^4J_{\text{H-H}} = 1.2$  Hz, *CH*).  $^{13}\text{C}$  NMR ( $\text{CDCl}_3$ ): 21.34, 22.54, 23.83, 25.23 ( $\text{CH}_3\text{-Mes}$ ), 125.53, 125.75, 130.48, 133.74, 135.18, 137.29 (*CH-Np*), 127.63 (br s), 128.64 (br s), 130.36 (br s), 130.72 (br s) (*CH-Mes*), 134.76, 142.42, 151.50, (CF). 136.89 (br s), 138.65 (br s), 138.89 (br s), 139.34 (br s), 139.81 (br s), 143.50 (br s), 143.88 (br s), 146.22, 146.43, 146.96, 148.51, 148.70, 163.54 (quaternary C, CB and CHg).  $^{19}\text{F}$  NMR ( $\text{CDCl}_3$ ): -116.8 (m, 2F,  $^3J_{\text{F-Hg}} = 499$  Hz,  $F_{\text{ortho}}$ ), -152.5 (t, 1F,  $^3J_{\text{F-F}} = 19.7$  Hz,  $F_{\text{para}}$ ), -159.09 (m, 2F,  $F_{\text{meta}}$ ).  $^{199}\text{Hg}$  NMR ( $\text{CDCl}_3$ ): -741.9 (tt,  $^3J_{\text{Hg-F}} = 499$  Hz,  $^4J_{\text{Hg-F}} = 165$  Hz).  $^{11}\text{B}$  NMR ( $\text{CDCl}_3$ ): +72. Anal. Calcd for  $\text{C}_{34}\text{H}_{28}\text{BF}_5\text{Hg}$ : C, 54.96; H, 3.80. Found: C 54.92; H 3.75.

**$[\mathbf{2}\cdot\mu_2\text{-F}][\text{S}(\text{NMe}_2)_3]^+$** : To a solution of **2** (100 mg, 0.13 mmol) in  $\text{CHCl}_3$  (2 mL) was added one equivalent of TASF (37 mg, 0.13 mmol) at room temperature. The mixture is stirred at room temperature for 10 minutes and stored at  $-18^\circ\text{C}$  overnight to induce the crystallization of  $[\mathbf{2}\cdot\mu_2\text{-F}][\text{S}(\text{NMe}_2)_3]^+$ . After filtration and washing with hexane (2 mL) and ether (2 mL), the product was obtained as colorless crystals (m= 110 mg, 89 %). mp.  $215^\circ\text{C}$  (dec).  $^1\text{H}$  NMR ( $\text{CD}_3\text{CN}$ ): 1.67 (br s, 6H, *Mes-CH<sub>3</sub>*), 1.83 (br s, 3H, *Mes-CH<sub>3</sub>*), 2.00 (br s, 3H, *Mes-CH<sub>3</sub>*), 2.16 (m, 6H, *Mes-CH<sub>3</sub>*), 2.84 (s, 18H, *N-CH<sub>3</sub>*), 6.32-6.64 (br s, 4H, *Mes-CH*), 7.08 (t, 1H,  $^3J_{\text{H-H}} = 7.5$  Hz), 7.19 (dd, 1H,  $^3J_{\text{H-H}} = 7.5$  Hz,  $^4J_{\text{H-H}} = 1.4$  Hz), 7.30 (d, 2H,  $^3J_{\text{H-H}} = 5.1$  Hz), 7.54 (dd, 1H,  $^3J_{\text{H-H}} = 7.5$  Hz,  $^4J_{\text{H-H}} = 1.4$  Hz), 7.69 (t, 1H,  $^3J_{\text{H-H}} = 5.1$  Hz).  $^{13}\text{C}$  NMR ( $\text{CD}_3\text{CN}$ ): 20.04 (Br s), 23.65 (Br s), 24.44 (Br s) ( $\text{CH}_3\text{-Mes}$ ), 37.99 (*N-CH<sub>3</sub>*), 123.10, 124.78, 126.35, 129.40, 132.81, 135.88 (*CH-Np*), 127.91 (Br s), 128.33 (Br s), 128.92 (Br s) (*CH-Mes*), 131.90 (br s), 134.29 (br s), 135.53, 136.46, 138.24, 138.68, 138.94, 140.59 (br s), 142.50 (br s), 145.54, 145.92, 146.32, 148.51,

149.11, 150.12 (br s), 156.26 (br s), 161.18 (br s), 165.87 (CF, quaternary C, CB and CHg).  $^{19}\text{F}$  NMR ( $\text{CD}_3\text{CN}$ ): -117.1 (m, 2F,  $^2J_{\text{F-Hg}} = 384.8$  Hz,  $F_{ortho}$ ), -159.0 (t, 1F,  $^3J_{\text{F-F}} = 19.2$  Hz,  $F_{para}$ ), -163.5 (m, 2F,  $F_{meta}$ ), -164.3 (m, 1F,  $\mu^2\text{-F}$ ).  $^{199}\text{Hg}$  NMR ( $\text{CD}_3\text{CN}$ ): -811.8 (dt,  $^1J_{\text{Hg-F}} = 135.2$  Hz,  $^3J_{\text{Hg-F}} = 387.1$  Hz,  $^4J_{\text{Hg-F}} = 65.8$  Hz).  $^{11}\text{B}$  NMR ( $\text{CD}_3\text{CN}$ ): +8.5  
 Anal. Calcd for  $\text{C}_{40}\text{H}_{46}\text{BF}_6\text{HgN}_3\text{S}$ : C, 51.87; H, 5.01. Found: C 51.48; H 4.91. MS (ESI)  $m/z = 763.135$  [ $\mathbf{2-F}$ ] $^-$ . CV (DMSO): reversible wave at 1.965 eV relative to  $\text{Fc}/\text{Fc}^+$ .

## UV-Vis spectrum of **2** and $[2-\mu^2-F]^- [nBu_4N]^+$ - Titration of **2** with $F^-$

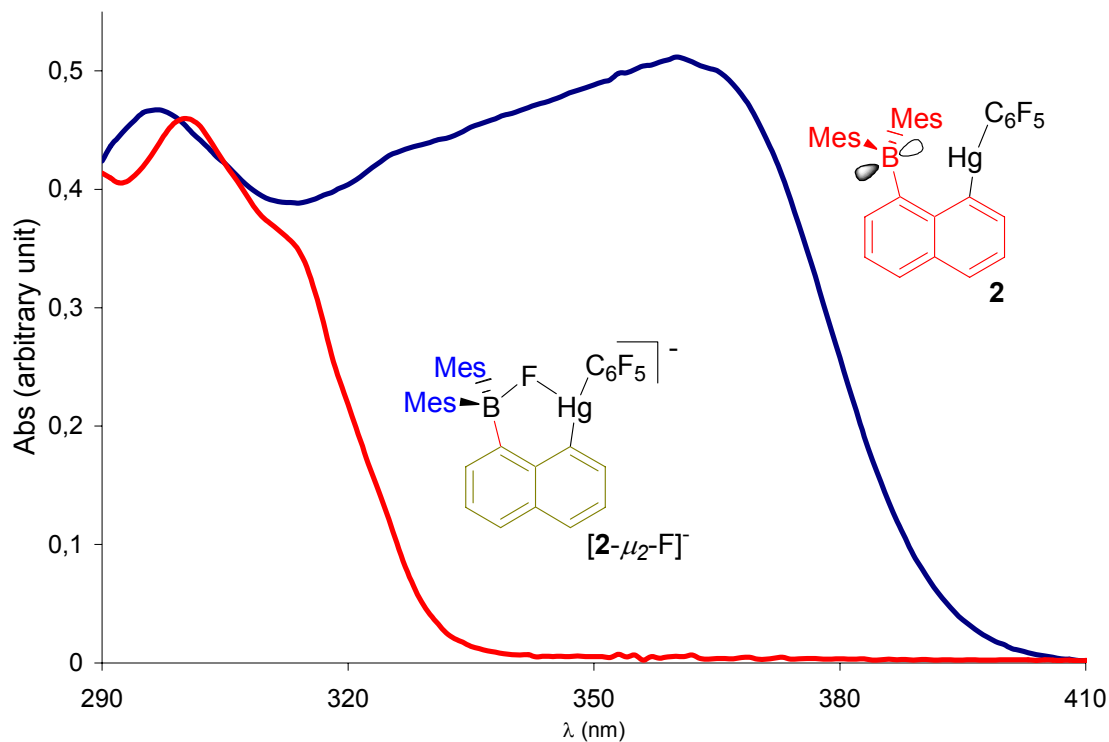

**Figure SI- 1:** UV-Visible spectrum of **2** and  $[2-\mu^2-F]^- [nBu_4N]^+$ .

### Derivation of the fluoride titration isotherm

In the following equations  $pFBHg = \mathbf{2}$  and  $pFBHgF = [2-\mu^2-F]^-$ .

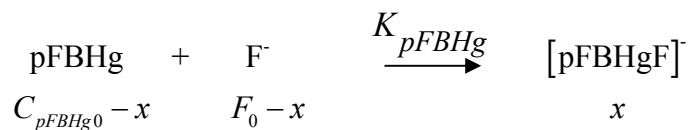

**Equation SI- 1:** Chemical distribution after addition of fluoride to a solution of **2**.

$$K_{pFBHg} = \frac{[pFBHg]}{[pFBHgF] * [F^-]} = \frac{x}{(C_{pFBHg0} - x) * (F_0^- - x)}$$

$$\Rightarrow x^2 - x \left( C_{pFBHg0} + F_0^- + \frac{1}{K_{pFBHg}} \right) + C_{pFBHg0} * F_0^- = 0$$

$$\Rightarrow x = \frac{A - \sqrt{A^2 - 4 * C_{pFBHg0} * F_0^-}}{2} \quad \text{with } A = C_{pFBHg0} + F_0^- + \frac{1}{K_{pFBHg}}$$

**Equation SI- 2:** Relationship between the observed absorption with respect to the amount of fluoride added and to the binding constant  $K_{pFBHg}$ .

### Titration in THF

A solution of **2** (3 mL,  $5 \cdot 10^{-5}$  M, THF) was placed in the cell and was titrated with incremental amounts of fluoride by addition of a solution of  $nBu_4NF$  in THF ( $5.82 \cdot 10^{-3}$  M). The absorption was monitored at  $\lambda_{max} = 361$  nm ( $\epsilon = 10200$ ).

| C <sub>Fluoride</sub> | Abs <sub>(361 nm)</sub> | C <sub>Fluoride</sub> | Abs <sub>(361 nm)</sub> |
|-----------------------|-------------------------|-----------------------|-------------------------|
| 0.00E+00              | 0.51022                 | 3.61E-05              | 0.13821                 |
| 2.42E-06              | 0.48784                 | 3.85E-05              | 0.11064                 |
| 4.84E-06              | 0.45853                 | 4.09E-05              | 0.08489                 |
| 7.26E-06              | 0.43579                 | 4.33E-05              | 0.05932                 |
| 9.68E-06              | 0.41097                 | 4.57E-05              | 0.03284                 |
| 1.21E-05              | 0.38955                 | 4.81E-05              | 0.01376                 |
| 1.45E-05              | 0.36446                 | 5.04E-05              | 0.00443                 |
| 1.69E-05              | 0.34091                 | 5.28E-05              | 0.00377                 |
| 1.93E-05              | 0.31701                 | 5.52E-05              | 0.00579                 |
| 2.17E-05              | 0.29065                 | 5.76E-05              | 0.0055                  |
| 2.41E-05              | 0.26501                 | 6.00E-05              | 0.00513                 |
| 2.65E-05              | 0.23971                 | 6.23E-05              | 0.00585                 |
| 2.89E-05              | 0.2119                  | 6.47E-05              | 0.00732                 |
| 3.13E-05              | 0.18763                 | 6.71E-05              | 0.00599                 |
| 3.37E-05              | 0.16385                 |                       |                         |

**Table SI- 1:** Absorbance of a solution of **2** (THF) after successive additions of fluoride.

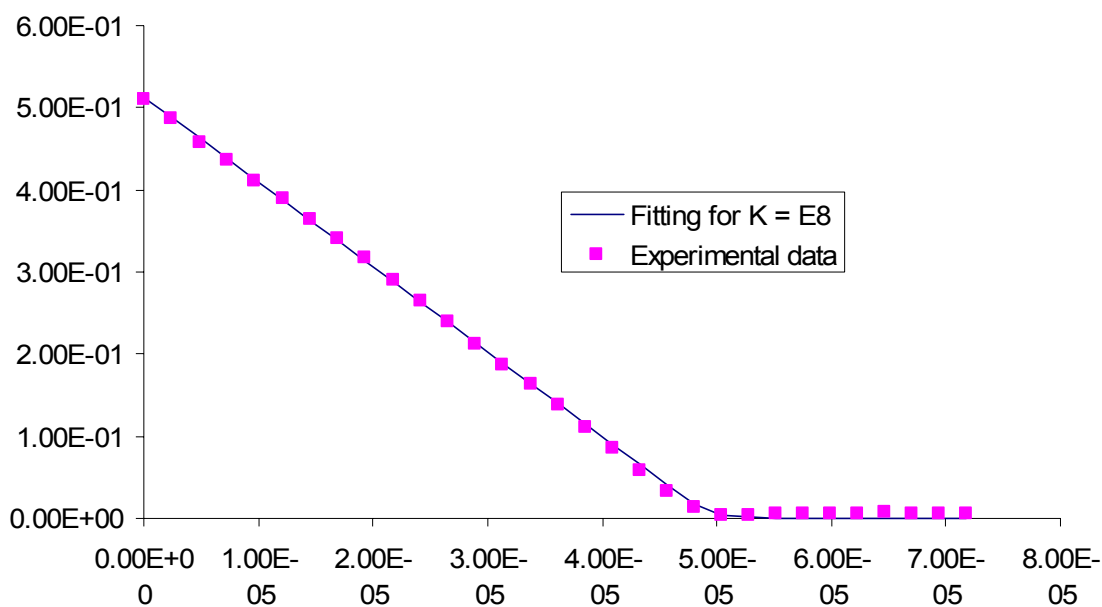

**Figure SI- 2:** Absorbance of a solution of **2** (THF) vs. fluoride concentration (M)

The experimental data obtained indicated that the binding constant is higher than  $10^8 \text{ M}^{-1}$  in THF.

#### Determination of the fluoride binding constant of trimesitylborane in THF-H<sub>2</sub>O (90/10)

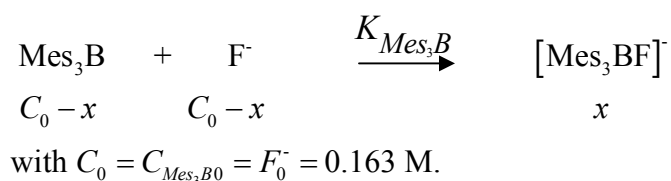

$$K_{\text{Mes}_3\text{B}} = \frac{[\text{Mes}_3\text{BF}]^-}{[\text{Mes}_3\text{B}]^*[\text{F}^-]} = \frac{x}{(C_0 - x)^2}$$

**Equation SI- 3:** Chemical distribution after addition of fluoride to a solution of Mes<sub>3</sub>B and TBAF.

60 mg of trimesitylborane (1.63 mmol) and 51 mg of TBAF·3H<sub>2</sub>O (1.63 mmol, 1 eq) were dissolved in 1 mL of a THF-H<sub>2</sub>O (90/10) solution. The <sup>19</sup>F NMR (400 MHz) was recorded, showing two signals at -119.3 ppm and -151.7 ppm for free fluoride anion and trimesitylborane fluoride adduct respectively.



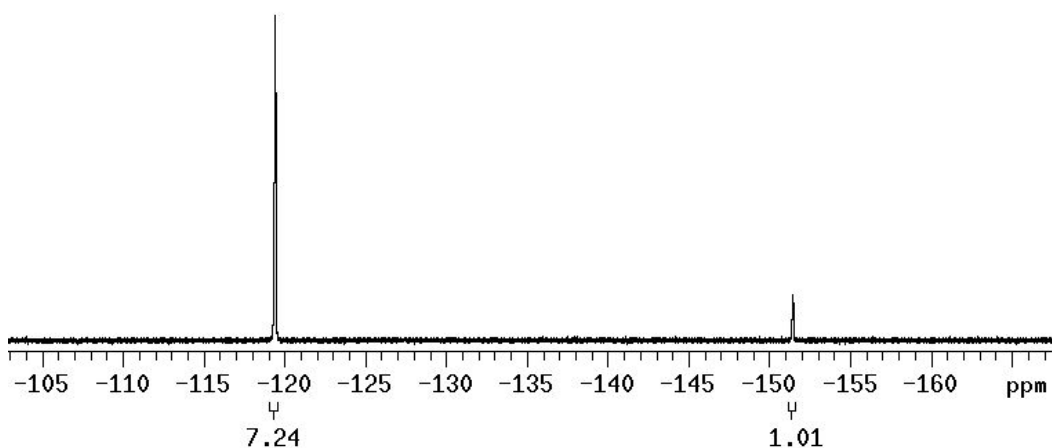

**Figure SI- 3:**  $^{19}\text{F}$  NMR of a 0.163 M solution of  $\text{BMes}_3$  and TBAF in THF- $\text{H}_2\text{O}$  (90/10).

The relative integration gives  $x = 1.99 \cdot 10^{-2}$  M, and  $C_0 - x = 0.143$  M. Therefore the binding constant of trimesitylborane is  $K_{\text{Mes}_3\text{B}} = 1 (\pm 0.3) \text{ M}^{-1}$ .

#### Titration in a THF- $\text{H}_2\text{O}$ (90/10)

A solution of **2** (3 mL,  $4.5 \cdot 10^{-5}$  M, THF- $\text{H}_2\text{O}$  90/10 (vol.)) was placed in the cell and was titrated with incremental amounts of fluoride by addition of a solution of  $\text{nBu}_4\text{NF}$  in THF ( $5.7 \cdot 10^{-3}$  M). The absorption was monitored at  $\lambda_{\text{max}} = 361 \text{ nm}$  ( $\epsilon = 9850$ ).

| $C_{\text{Fluoride}}$ | Abs <sub>(361 nm)</sub> | $C_{\text{Fluoride}}$ | Abs <sub>(361 nm)</sub> |
|-----------------------|-------------------------|-----------------------|-------------------------|
| 0.00E+00              | 0.45047                 | 5.18E-05              | 0.24579                 |
| 4.75E-06              | 0.43114                 | 5.64E-05              | 0.21995                 |
| 9.48E-06              | 0.40972                 | 7.50E-05              | 0.1829                  |
| 1.42E-05              | 0.38949                 | 9.34E-05              | 0.15881                 |
| 1.89E-05              | 0.3701                  | 1.12E-04              | 0.13525                 |
| 2.37E-05              | 0.34852                 | 1.30E-04              | 0.11735                 |
| 2.84E-05              | 0.31669                 | 1.48E-04              | 0.10578                 |
| 3.31E-05              | 0.30459                 | 1.66E-04              | 0.09523                 |
| 3.77E-05              | 0.28971                 | 1.84E-04              | 0.08509                 |
| 4.24E-05              | 0.26564                 | 2.02E-04              | 0.07974                 |
| 4.71E-05              | 0.25625                 |                       |                         |

**Table SI- 2:** Absorbance of a solution of **2** (THF- $\text{H}_2\text{O}$ : 90/10) after successive addition of fluoride.

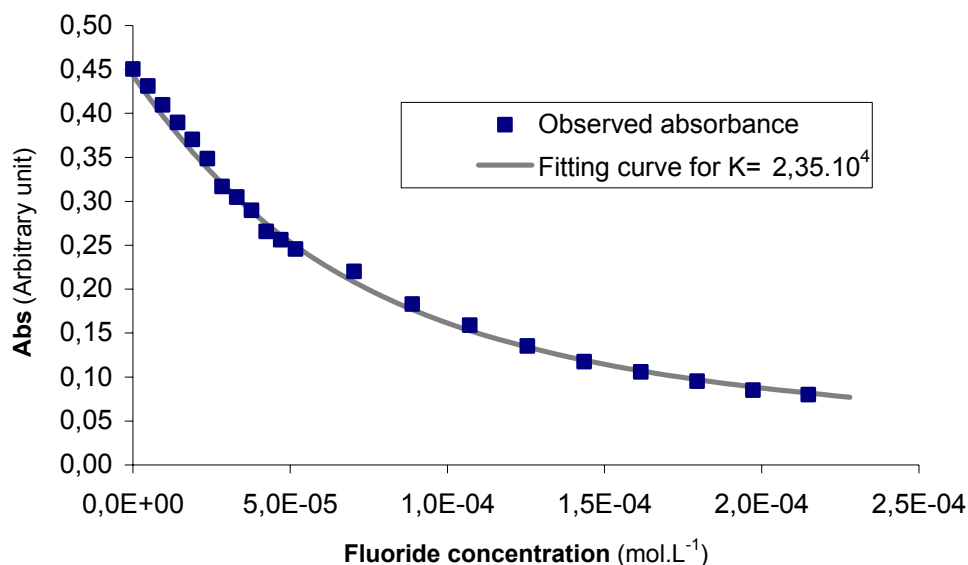

**Figure SI- 4:** Absorbance of a solution of **2** (THF-H<sub>2</sub>O: 90/10) vs. fluoride concentration.

The experimental data was fitted by hand to the above equation ( $C_{pFBHg0} = 4.5 \cdot 10^{-5} \text{ M}$ ).

This fit yielded  $K_{pFBHg} = 2.35 (\pm 0.2) \cdot 10^4 \text{ M}^{-1}$ .

### Binding selectivity studies

Fluoride binding by **2** also occurs in the presence of other anions. This has been confirmed by monitoring the absorption, <sup>1</sup>H NMR, or <sup>19</sup>F NMR spectra of **2** upon successive additions of different anions. For example, the successive addition of chloride, bromide, and iodide to a solution of **2** in THF does not lead to any noticeable changes of the spectroscopic features of **2**. Addition of fluoride to the same solution results in the formation of [2-F]<sup>-</sup>. Similar experiments have been carried out with the other anions.

**Solid state luminescence spectrum of **2** and  $[2-\mu^2\text{-F}]\cdot[\text{S}(\text{NMe}_2)_3]^+$**

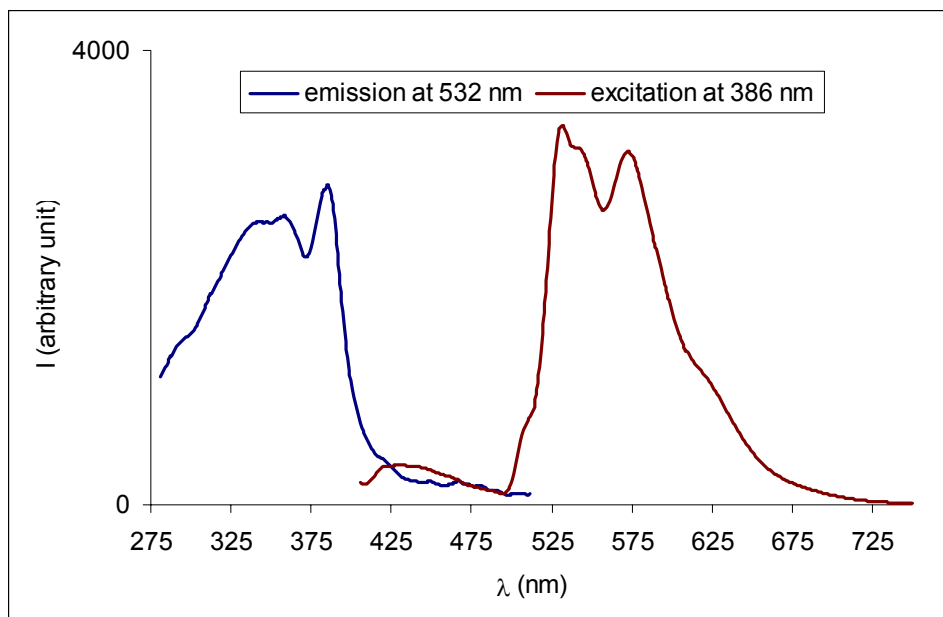

**Figure SI- 5:** Emission and excitation spectrum of **2** at 77 K.

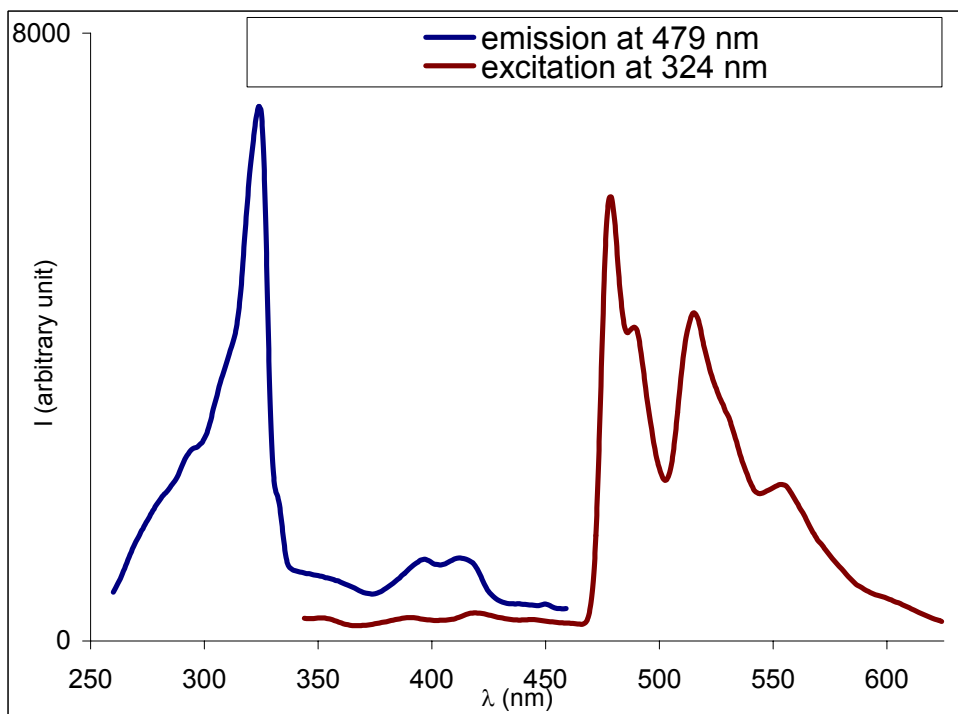

**Figure SI- 6:** Emission and excitation spectrum of  $[2-\mu^2\text{-F}]\cdot[\text{S}(\text{NMe}_2)_3]^+$  at 77 K.
